CORRECTION

# Correction: CD73 Expressed on $\gamma\delta$ T Cells Shapes Their Regulatory Effect in Experimental Autoimmune Uveitis

Dongchun Liang, Aijun Zuo, Ronglan Zhao, Hui Shao, Willi K. Born, Rebecca L. O'Brien, Henry J. Kaplan, Deming Sun

The following information is missing from the Funding section: This work was supported by an unrestricted grant from Research to Prevent Blindness (RPB), Inc., New York, New York.

## Reference

1. Liang D, Zuo A, Zhao R, Shao H, Born WK, O'Brien RL, et al. (2016) CD73 Expressed on  $\gamma\delta$  T Cells Shapes Their Regulatory Effect in Experimental Autoimmune Uveitis. PLoS ONE 11(2): e0150078. doi:[10.1371/journal.pone.0150078](https://doi.org/10.1371/journal.pone.0150078) PMID: [26919582](https://pubmed.ncbi.nlm.nih.gov/26919582/)

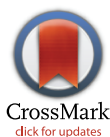

## OPEN ACCESS

**Citation:** Liang D, Zuo A, Zhao R, Shao H, Born WK, O'Brien RL, et al. (2016) Correction: CD73 Expressed on  $\gamma\delta$  T Cells Shapes Their Regulatory Effect in Experimental Autoimmune Uveitis. PLoS ONE 11(10): e0164502. doi:[10.1371/journal.pone.0164502](https://doi.org/10.1371/journal.pone.0164502)

**Published:** October 4, 2016

**Copyright:** © 2016 Liang et al. This is an open access article distributed under the terms of the [Creative Commons Attribution License](https://creativecommons.org/licenses/by/4.0/), which permits unrestricted use, distribution, and reproduction in any medium, provided the original author and source are credited.
